# Supplementary material
Source: PubMed Central journal article supplement (PMC4646219)
Supplement: NIHMS735728-supplement-supplement_1.pdf [file NIHMS735728-supplement-supplement_1.pdf]

**Supplementary Table 1.** Variables included in the analyses

1. Clinical subgroup (JDM/JPM/JCTM)
2. Gender
3. Race (analyzed as White/Non-White and White/Black/Hispanic/Asian/Other)
4. Age at diagnosis
5. Age at onset
6. Delay in diagnosis
7. Ever hospitalized
8. Anti-nuclear antibodies (analyzed as positive vs. negative and by titer)
9. Onset speed
10. Illness severity at onset
11. Date of diagnosis
12. Muscle enzymes, highest (creatine kinase, aldolase, aspartate aminotransferase, alanine aminotransferase, lactate dehydrogenase)
13. Any myositis-specific antibody
14. Any myositis-associated antibody
15. Anti-signal recognition particle autoantibodies
16. Any anti-tRNA synthetase autoantibody
17. Specific anti-tRNA synthetase autoantibodies (-histidyl, -alanyl, -glycyl, -asparaginy, -isoleucyl, -threonyl)
18. Anti-Ku autoantibodies
19. Anti-Mi2 autoantibodies
20. Anti-p155/140 autoantibodies
21. Anti-MJ autoantibodies
22. Anti-Sm autoantibodies
23. Anti-Ro autoantibodies
24. Anti-La autoantibodies
25. Anti-U1RNP autoantibodies
26. Any Anti-URNP autoantibodies (Anti-U1RNP, Anti-U2RNP, Anti-U3RNP, Anti-U4RNP, Anti-U5RNP autoantibodies) or Anti-trimethyl guanosine cap autoantibodies
27. Anti-PM-Scl autoantibodies
28. Anti-small ubiquitin-like modifier activating enzyme autoantibodies
29. Anti-Th autoantibodies

The following clinical variables were analyzed, and were present prior to or at the time of diagnosis:

30. Weight loss
31. Fatigue
32. Adenopathy
33. Dysphonia
34. Muscle cramps
35. Arthralgia
36. Contractures
37. Dyspnea at rest
38. Abdominal pain
39. Abdominal perforation
40. Constipation

41. Heliotrope rash
42. Gottron's papules
43. Photosensitivity
44. Periungual capillary abnormalities
45. Skin ulcers
46. Erythroderma
47. Lipodystrophy
48. Pneumothorax/mediastinum
49. Gastroesophageal reflux
50. Mucous membrane involvement
51. Other erythematous rashes
52. Malar rash
53. Linear extensor erythema
54. Interstitial lung disease
55. Arthritis
56. Fever
57. Raynaud's phenomenon
58. Dyspnea on exertion
59. Mechanic's hands
60. Heart palpitations
61. Dysphagia
62. Proximal weakness
63. Distal weakness
64. Combined proximal and distal weakness
65. Muscle atrophy
66. Falling
67. Carpal tunnel
68. Myalgias
69. Asymmetric weakness
70. "V-sign" rash
71. "Shawl-sign" rash
72. Cuticular overgrowth
73. Sclerodactyly
74. Calcinosis
75. Sicca symptoms
76. Diarrhea
77. Edema
78. Infarcts, non-digital
79. Digital infarcts
80. Other vasculitic rashes
81. Pruritus
82. Panniculitis
83. Skin atrophy
84. Syncope
